# Supplementary material for: Differences in clinical features and morphology between differentiated and undifferentiated gastric cancer after Helicobacter pylori eradication
Source: PubMed Central journal article supplement (PMC10065271; doi:10.1371/journal.pone.0282341), 2023-03-31
Supplement: pone.0282341.s003.pdf [file pone.0282341.s003.pdf]

| No. | age at HPE | Sex | Duration after HPE | Follow up (+:1,-:0) | Location | Size1 (mm) | Size2 (mm) | Invasion | Histology<br>(D:Differentiated,<br>U:Undifferentiated) |
|-----|------------|-----|--------------------|---------------------|----------|------------|------------|----------|--------------------------------------------------------|
| 1   | 65         | F   | 123                | 1                   | U        | 15         | 15         | M        | D                                                      |
| 2   | 65         | M   | 33                 | 1                   | M        | 10         | 10         | M        | D                                                      |
| 3   | 61         | F   | 18                 | 1                   | M        | 20         | 20         | M        | D                                                      |
| 4   | 70         | M   | 113                | 1                   | M        | 20         | 7          | M        | D                                                      |
| 5   | 57         | F   | 16                 | 1                   | M        | 25         | 8          | M        | D                                                      |
| 6   | 63         | M   | 59                 | 1                   | M        | 10         | 6          | M        | D                                                      |
| 7   | 60         | M   | 12                 | 1                   | L        | 5          | 5          | M        | D                                                      |
| 8   | 70         | M   | 26                 | 1                   | L        | 20         | 5          | M        | D                                                      |
| 9   | 63         | M   | 57                 | 0                   | L        | 10         | 8          | SM       | D                                                      |
| 10  | 46         | M   | 7                  | 1                   | L        | 10         | 10         | M        | D                                                      |
| 11  | 74         | M   | 6                  | 1                   | L        | 20         | 4          | M        | D                                                      |
| 12  | 68         | M   | 48                 | 1                   | U        | 0.7        | 0.7        | M        | D                                                      |
| 13  | 57         | M   | 60                 | 1                   | L        | 25         | 25         | M        | D                                                      |
| 14  | 72         | M   | 2                  | 1                   | U        | 23         | 20         | M        | D                                                      |
| 15  | 70         | M   | 24                 | 0                   | U        | 11         | 20         | M        | D                                                      |
| 16  | 59         | M   | 136                | 1                   | U        | 10         | 8          | M        | D                                                      |
| 17  | 59         | M   | 96                 | 1                   | M        | 12         | 12         | M        | D                                                      |
| 18  | 80         | M   | 24                 | 1                   | M        | 6          | 4          | M        | D                                                      |
| 19  | 47         | F   | 27                 | 1                   | M        | 35         | 28         | SE       | D                                                      |
| 20  | 70         | M   | 47                 | 1                   | U        | 15         | 6          | M        | D                                                      |
| 21  | 68         | M   | 3                  | 0                   | U        | 31         | 31         | M        | D                                                      |
| 22  | 61         | F   | 56                 | 0                   | U        | 10         | 10         | M        | D                                                      |
| 23  | 71         | F   | 69                 | 1                   | M        | 19         | 11         | M        | D                                                      |
| 24  | 64         | M   | 5                  | 1                   | U        | 9          | 8          | SM       | D                                                      |
| 25  | 63         | M   | 156                | 0                   | U        | 10         | 10         | M        | D                                                      |
| 26  | 71         | M   | 48                 | 1                   | L        | 10         | 8          | M        | D                                                      |
| 27  | 71         | M   | 12                 | 1                   | L        | 5          | 5          | M        | D                                                      |
| 28  | 80         | M   | 120                | 0                   | M        | 5          | 5          | M        | D                                                      |
| 29  | 52         | F   | 74                 | 0                   | M        | 29         | 17         | M        | D                                                      |
| 30  | 70         | F   | 103                | 1                   | M        | 15         | 12         | M        | D                                                      |
| 31  | 78         | M   | 27                 | 1                   | M        | 10         | 7          | M        | D                                                      |
| 32  | 73         | M   | 4                  | 0                   | M        | 13         | 11         | M        | D                                                      |
| 33  | 63         | M   | 37                 | 1                   | M        | 10         | 10         | M        | D                                                      |
| 34  | 65         | M   | 110                | 0                   | M        | 9          | 5          | M        | D                                                      |
| 35  | 57         | M   | 150                | 1                   | L        | 26         | 17         | M        | D                                                      |
| 36  | 80         | M   | 8                  | 1                   | M        | 10         | 8          | SM       | D                                                      |
| 37  | 64         | M   | 58                 | 0                   | M        | 13         | 13         | M        | D                                                      |
| 38  | 54         | F   | 6                  | 1                   | M        | 31         | 31         | M        | D                                                      |
| 39  | 56         | M   | 36                 | 0                   | M        | 14         | 14         | M        | D                                                      |
| 40  | 59         | M   | 120                | 1                   | M        | 7          | 7          | M        | D                                                      |
| 41  | 52         | F   | 85                 | 0                   | L        | 15         | 13         | M        | D                                                      |

|    |    |   |     |   |   |    |    |    |   |
|----|----|---|-----|---|---|----|----|----|---|
| 42 | 52 | F | 30  | 0 | L | 25 | 23 | M  | D |
| 43 | 68 | M | 7   | 1 | L | 20 | 18 | M  | D |
| 44 | 65 | M | 8   | 1 | L | 5  | 5  | M  | D |
| 45 | 57 | M | 24  | 0 | L | 12 | 12 | M  | D |
| 46 | 72 | M | 9   | 1 | L | 14 | 11 | M  | D |
| 47 | 59 | M | 8   | 1 | L | 20 | 15 | M  | D |
| 48 | 68 | M | 98  | 0 | L | 12 | 12 | M  | D |
| 49 | 74 | M | 12  | 0 | L | 12 | 12 | M  | D |
| 50 | 75 | M | 7   | 0 | L | 5  | 7  | M  | D |
| 51 | 62 | F | 39  | 1 | U | 7  | 4  | M  | D |
| 52 | 54 | M | 210 | 0 | U | 22 | 13 | SM | D |
| 53 | 66 | M | 16  | 1 | M | 6  | 6  | M  | D |
| 54 | 67 | M | 144 | 1 | U | 3  | 2  | M  | D |
| 55 | 67 | M | 147 | 1 | U | 11 | 9  | M  | D |
| 56 | 62 | M | 69  | 1 | L | 7  | 6  | M  | D |
| 57 | 62 | M | 14  | 1 | M | 5  | 4  | M  | D |
| 58 | 62 | M | 156 | 1 | M | 10 | 7  | M  | D |
| 59 | 67 | M | 20  | 1 | M | 22 | 13 | SM | D |
| 60 | 68 | M | 72  | 1 | M | 4  | 4  | M  | D |
| 61 | 83 | F | 72  | 1 | M | 12 | 7  | M  | D |
| 62 | 68 | M | 68  | 0 | L | 55 | 50 | M  | D |
| 63 | 59 | M | 39  | 1 | M | 5  | 4  | M  | D |
| 64 | 58 | F | 24  | 1 | M | 7  | 4  | M  | D |
| 65 | 73 | M | 72  | 1 | M | 6  | 5  | M  | D |
| 66 | 65 | F | 90  | 1 | M | 5  | 4  | M  | D |
| 67 | 60 | m | 260 | 1 | L | 13 | 9  | M  | D |
| 68 | 67 | M | 20  | 1 | M | 7  | 4  | M  | D |
| 69 | 68 | M | 72  | 1 | M | 8  | 5  | M  | D |
| 70 | 65 | m | 6   | 1 | M | 1  | 1  | M  | D |
| 71 | 74 | F | 14  | 1 | L | 16 | 7  | M  | D |
| 72 | 73 | M | 72  | 1 | L | 16 | 10 | M  | D |
| 73 | 76 | M | 102 | 0 | L | 15 | 12 | M  | D |
| 74 | 62 | M | 69  | 1 | L | 10 | 8  | M  | D |
| 75 | 51 | m | 12  | 1 | L | 40 | 35 | M  | D |
| 76 | 68 | M | 75  | 1 | L | 7  | 4  | M  | D |
| 77 | 73 | M | 21  | 1 | L | 7  | 6  | M  | D |
| 78 | 63 | M | 84  | 1 | L | 11 | 10 | M  | D |
| 79 | 62 | M | 120 | 1 | L | 5  | 4  | M  | D |
| 80 | 67 | M | 132 | 1 | L | 6  | 4  | M  | D |
| 81 | 55 | M | 91  | 0 | M | 11 | 18 | M  | D |
| 82 | 51 | M | 84  | 1 | M | 14 | 14 | SM | D |
| 83 | 48 | M | 32  | 1 | M | 10 | 6  | M  | D |
| 84 | 75 | M | 4   | 1 | U | 10 | 3  | M  | D |
| 85 | 53 | M | 13  | 1 | L | 20 | 20 | M  | D |
| 86 | 71 | M | 48  | 1 | L | 15 | 15 | M  | D |
| 87 | 66 | M | 120 | 0 | U | 21 | 30 | M  | D |
| 88 | 73 | M | 98  | 1 | U | 28 | 22 | MP | D |
| 89 | 70 | M | 9   | 1 | U | 15 | 8  | SM | D |

|     |    |   |     |   |   |    |    |    |   |
|-----|----|---|-----|---|---|----|----|----|---|
| 90  | 76 | M | 4   | 1 | U | 76 | 40 | SM | D |
| 91  | 68 | M | 7   | 1 | M | 11 | 20 | M  | D |
| 92  | 74 | M | 4   | 0 | M | 15 | 15 | M  | D |
| 93  | 80 | M | 60  | 1 | M | 20 | 15 | SM | D |
| 94  | 52 | M | 161 | 1 | M | 27 | 22 | M  | D |
| 95  | 66 | F | 35  | 1 | M | 21 | 30 | M  | D |
| 96  | 75 | M | 204 | 0 | M | 21 | 30 | M  | D |
| 97  | 45 | M | 12  | 1 | L | 15 | 10 | M  | D |
| 98  | 64 | M | 43  | 0 | L | 5  | 7  | M  | D |
| 99  | 75 | F | 50  | 0 | L | 12 | 12 | M  | D |
| 100 | 62 | M | 8   | 1 | M | 7  | 5  | M  | D |
| 101 | 67 | M | 56  | 1 | U | 16 | 4  | SM | D |
| 102 | 62 | M | 9   | 1 | M | 7  | 5  | M  | D |
| 103 | 69 | M | 20  | 1 | M | 19 | 14 | M  | D |
| 104 | 73 | M | 10  | 1 | M | 11 | 8  | M  | D |
| 105 | 78 | M | 45  | 0 | L | 8  | 8  | SM | D |
| 106 | 76 | F | 60  | 1 | L | 16 | 8  | M  | D |
| 107 | 68 | M | 77  | 1 | M | 6  | 6  | M  | D |
| 108 | 65 | m | 6   | 1 | M | 16 | 10 | M  | D |
| 109 | 78 | M | 35  | 1 | L | 10 | 6  | M  | D |
| 110 | 68 | M | 71  | 1 | L | 55 | 50 | M  | D |
| 111 | 68 | M | 26  | 1 | L | 11 | 10 | M  | D |
| 112 | 51 | m | 11  | 1 | M | 9  | 5  | SM | D |
| 113 | 69 | M | 24  | 1 | L | 10 | 7  | M  | D |
| 114 | 61 | F | 10  | 1 | U | 55 | 55 | MP | U |
| 115 | 64 | M | 114 | 1 | U | 30 | 30 | MP | U |
| 116 | 51 | F | 62  | 0 | M | 20 | 15 | SM | U |
| 117 | 53 | M | 51  | 0 | M | 35 | 35 | MP | U |
| 118 | 67 | M | 44  | 0 | L | 38 | 32 | M  | U |
| 119 | 72 | M | 52  | 1 | L | 15 | 15 | SM | U |
| 120 | 61 | F | 96  | 0 | L | 22 | 10 | M  | U |
| 121 | 60 | M | 108 | 0 | L | 15 | 8  | SM | U |
| 122 | 55 | M | 113 | 0 | M | 30 | 13 | SM | U |
| 123 | 51 | F | 62  | 1 | M | 8  | 6  | M  | U |
| 124 | 52 | F | 6   | 1 | L | 20 | 20 | SM | U |
| 125 | 81 | M | 8   | 0 | M | 12 | 12 | M  | U |
| 126 | 66 | F | 24  | 0 | M | 11 | 11 | M  | U |
| 127 | 52 | M | 211 | 1 | L | 68 | 39 | SE | U |
| 128 | 63 | M | 12  | 1 | M | 66 | 50 | M  | U |
| 129 | 77 | F | 28  | 1 | L | 19 | 14 | M  | U |
