# Supplementary material for: Differences in clinical features and morphology between differentiated and undifferentiated gastric cancer after Helicobacter pylori eradication
Source: PubMed Central journal article supplement (PMC10065271; doi:10.1371/journal.pone.0282341), 2023-03-31
Supplement: pone.0282341.s004.pdf [file pone.0282341.s004.pdf]

| No. | 除菌後期間     | location | Histology     |
|-----|-----------|----------|---------------|
| 1   | 123       | U        | Differentited |
| 2   | 33        | M        | Differentited |
| 3   | 18        | M        | Differentited |
| 4   | 113       | M        | Differentited |
| 5   | 16        | M        | Differentited |
| 6   | 59        | M        | Differentited |
| 7   | 12        | L        | Differentited |
| 8   | 26        | L        | Differentited |
| 9   | 57        | L        | Differentited |
| 10  | 7         | L        | Differentited |
| 11  | 6         | L        | Differentited |
| 12  | 48        | U        | Differentited |
| 13  | <b>60</b> | L        | Differentited |
| 14  | 2         | U        | Differentited |
| 15  | 24        | U        | Differentited |
| 16  | 136       | U        | Differentited |
| 17  | 96        | M        | Differentited |
| 18  | 24        | M        | Differentited |
| 19  | 27        | M        | Differentited |
| 20  | 47        | U        | Differentited |
| 21  | 3         | U        | Differentited |
| 22  | 56        | U        | Differentited |
| 23  | 69        | M        | Differentited |
| 24  | 5         | U        | Differentited |
| 25  | 156       | U        | Differentited |
| 26  | 48        | L        | Differentited |
| 27  | 12        | L        | Differentited |
| 28  | 120       | M        | Differentited |
| 29  | 74        | M        | Differentited |
| 30  | 103       | M        | Differentited |
| 31  | 27        | M        | Differentited |
| 32  | 4         | M        | Differentited |
| 33  | 37        | M        | Differentited |
| 34  | 110       | M        | Differentited |
| 35  | 150       | L        | Differentited |
| 36  | 8         | M        | Differentited |
| 37  | 58        | M        | Differentited |

|    |     |   |               |
|----|-----|---|---------------|
| 38 | 6   | M | Differentited |
| 39 | 36  | M | Differentited |
| 40 | 120 | M | Differentited |
| 41 | 85  | L | Differentited |
| 42 | 30  | L | Differentited |
| 43 | 7   | L | Differentited |
| 44 | 8   | L | Differentited |
| 45 | 24  | L | Differentited |
| 46 | 9   | L | Differentited |
| 47 | 8   | L | Differentited |
| 48 | 98  | L | Differentited |
| 49 | 12  | L | Differentited |
| 50 | 7   | L | Differentited |
| 51 | 39  | U | Differentited |
| 52 | 210 | U | Differentited |
| 53 | 16  | M | Differentited |
| 54 | 144 | U | Differentited |
| 55 | 147 | U | Differentited |
| 56 | 69  | L | Differentited |
| 57 | 14  | M | Differentited |
| 58 | 156 | M | Differentited |
| 59 | 20  | M | Differentited |
| 60 | 72  | M | Differentited |
| 61 | 72  | M | Differentited |
| 62 | 68  | L | Differentited |
| 63 | 39  | M | Differentited |
| 64 | 24  | M | Differentited |
| 65 | 72  | M | Differentited |
| 66 | 90  | M | Differentited |
| 67 | 260 | L | Differentited |
| 68 | 20  | M | Differentited |
| 69 | 72  | M | Differentited |
| 70 | 6   | M | Differentited |
| 71 | 14  | L | Differentited |
| 72 | 72  | L | Differentited |
| 73 | 102 | L | Differentited |
| 74 | 69  | L | Differentited |
| 75 | 12  | L | Differentited |
| 76 | 75  | L | Differentited |
| 77 | 21  | L | Differentited |

|     |     |   |                  |
|-----|-----|---|------------------|
| 78  | 84  | L | Differentited    |
| 79  | 120 | L | Differentited    |
| 80  | 132 | L | Differentited    |
| 81  | 91  | M | Differentited    |
| 82  | 84  | M | Differentited    |
| 83  | 32  | M | Differentited    |
| 84  | 4   | U | Differentited    |
| 85  | 13  | L | Differentited    |
| 86  | 48  | L | Differentited    |
| 87  | 120 | U | Differentited    |
| 88  | 98  | U | Differentited    |
| 89  | 9   | U | Differentited    |
| 90  | 4   | U | Differentited    |
| 91  | 7   | M | Differentited    |
| 92  | 4   | M | Differentited    |
| 93  | 60  | M | Differentited    |
| 94  | 161 | M | Differentited    |
| 95  | 35  | M | Differentited    |
| 96  | 204 | M | Differentited    |
| 97  | 12  | L | Differentited    |
| 98  | 43  | L | Differentited    |
| 99  | 50  | L | Differentited    |
| 100 | 8   | M | Differentited    |
| 101 | 56  | U | Differentited    |
| 102 | 9   | M | Differentited    |
| 103 | 20  | M | Differentited    |
| 104 | 10  | M | Differentited    |
| 105 | 45  | L | Differentited    |
| 106 | 60  | L | Differentited    |
| 107 | 77  | M | Differentited    |
| 108 | 6   | M | Differentited    |
| 109 | 35  | L | Differentited    |
| 110 | 71  | L | Differentited    |
| 111 | 26  | L | Differentited    |
| 112 | 11  | M | Differentited    |
| 113 | 24  | L | Differentited    |
| 114 | 10  | U | undifferentiated |
| 115 | 114 | U | undifferentiated |
| 116 | 62  | M | undifferentiated |
| 117 | 51  | M | undifferentiated |

|     |     |   |                  |
|-----|-----|---|------------------|
| 118 | 44  | L | undifferentiated |
| 119 | 52  | L | undifferentiated |
| 120 | 96  | L | undifferentiated |
| 121 | 108 | L | undifferentiated |
| 122 | 113 | M | undifferentiated |
| 123 | 62  | M | undifferentiated |
| 124 | 6   | L | undifferentiated |
| 125 | 8   | M | undifferentiated |
| 126 | 24  | M | undifferentiated |
| 127 | 211 | L | undifferentiated |
| 128 | 12  | M | undifferentiated |
| 129 | 28  | L | undifferentiated |
